# Supplementary material
Source: PubMed Central journal article supplement (PMC3370538)
Supplement: supp_78.12.4294_AEM07473-11_FigS1.pdf [file supp_78.12.4294_AEM07473-11_FigS1.pdf]

*bg1A13* TGCCCCAAGAAACT**TGAAATAAATA**ATTATTTATAAACTATAAAAAAAAAAAAAAAAAAAAAAAAAAAAAA----- 940  
*bg1A16* TGCCCCAAGAAACT**TAAAATAAATAA***TTTTTATAAAC**TATAAAAA*CAAAAATAATAACAAATAATTCATTAAATGAATTAAAAATTAA 965  
*bg1A51* TGCCCCAAGAAAT**TAAAATAAATAA**TTTTTATGAACATAAAAAAAAAAAAAAAAAAAAAAAAAAAAAA----- 955  
*bg1M2* TGCCCCAAGAAAT**TAAAATAAATAA***TTTTTATAAAC**TATAAAAA*ATTACAATAATAACAAATAATTCATTAAATGAATTAAAAAAA 990  
*lic6* TGCCCCAAGAAAT**TAAAATAAATAA**TTTTTATGAATTACAAAAAAAAAAAAAAAAAAAAAAAAAAAAA----- 961

FIG. S1. Alignment of the ends of the coding regions and adjacent 3' untranslated regions of four cDNAs coding  $\beta$ -1,3-1,4-glucanase from *Neocallimastix patriciarum* J11. Stop codons are presented in bold and underlined. Premature stop codons are shown in bold. The sequences that were predicted to be able to form self-pairing regions are shown in italics and are underlined. The *lic6* gene of *Neocallimastix patriciarum* was accessed from Genbank (accession no. EU314934).
