# Supplementary material
Source: PubMed Central journal article supplement (PMC3370538)
Supplement: supp_78.12.4294_AEM07473-11_FigS2.pdf [file supp_78.12.4294_AEM07473-11_FigS2.pdf]

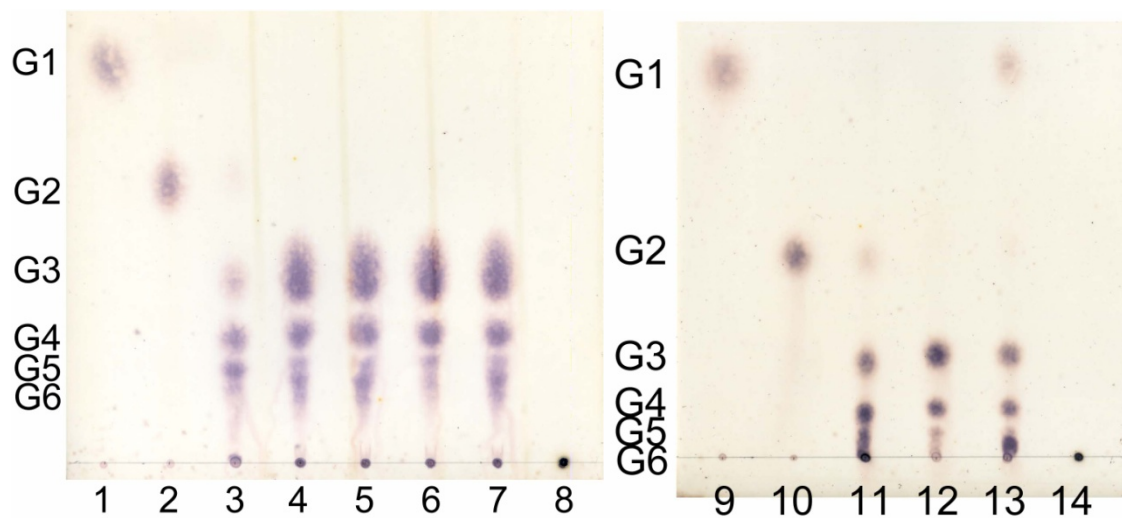

FIG. S2. Thin layer chromatography of hydrolysates produced by recombinant  $\beta$ -glucanases expressed by *bglA13* (lane 4), *bglA16* (lane 5), *bglA51* (lane 6), *bglM2* (lane 7) genes, *bglR* (lane 12) and *bglS* (lane 13). The enzymes were incubated at 50°C for two hours in a 2-ml solution containing 1%  $\beta$ -glucan in 50mM citrate (pH 6.0). After reaction, samples were heated to 100°C for 10 min to inactivate the enzyme and then spotted onto a chromatographic plate. Substrate solutions without enzyme supplementation were reacted under the same conditions and spotted on lanes 8 and 14. Glucose (G1), cellobiose (G2), and celluloligosaccharides mixtures containing cellotriose (G3), cellotetraose (G4), cellopentaose (G5), or cellohexaose (G6) were used as standards and separated in lanes 1, 2, 3, 9, 10, and 11 respectively.
